# Supplementary material for: Blood-Based Biomarkers as Prognostic Factors of Recurrent Disease after Radical Cystectomy: A Systematic Review and Meta-Analysis
Source: MDPI journal article supplement (doi:10.3390/ijms24065846), 2023-03-19
Supplement: s1 [file s1]

**Table 1: Risk Of Bias In Non-randomized Studies of Interventions (ROBINS-I)<sup>1</sup>:**

| Author                              | Confounding | Participant selection | Classification of interventions | Deviation from intended intervention | Missing data | Measurement of outcomes | Selection of the reported result | Overall  |
|-------------------------------------|-------------|-----------------------|---------------------------------|--------------------------------------|--------------|-------------------------|----------------------------------|----------|
| Mari et al. <sup>2</sup> , 2021     | Moderate    | Low                   | Low                             | Low                                  | Low          | Moderate                | Low                              | Low      |
| D'Andrea et al. <sup>3</sup> , 2017 | Moderate    | Low                   | Low                             | Moderate                             | Moderate     | Moderate                | Low                              | Moderate |
| Morizawa et al. <sup>4</sup> , 2016 | Moderate    | Serious               | Moderate                        | Moderate                             | Low          | Moderate                | Low                              | Moderate |
| Viers et al. <sup>5</sup> , 2014    | Moderate    | Moderate              | Moderate                        | Moderate                             | Moderate     | Moderate                | Moderate                         | Moderate |
| Tan et al. <sup>6</sup> , 2017      | Moderate    | Moderate              | Low                             | Low                                  | Moderate     | Low                     | Moderate                         | Moderate |
| Hermanns et al. <sup>7</sup> , 2014 | Moderate    | Moderate              | Moderate                        | Moderate                             | Moderate     | Low                     | Low                              | Moderate |
| Bhindi et al. <sup>8</sup> , 2016   | Moderate    | moderate              | Moderate                        | Moderate                             | Moderate     | Moderate                | Low                              | Moderate |

## References

1. Sterne JA, Hernán MA, Reeves BC, et al. ROBINS-I: a tool for assessing risk of bias in non-randomised studies of interventions. *BMJ*. 2016;355:i4919. doi:10.1136/bmj.i4919
2. Mari A, Muto G, Di Maida F, et al. Oncological impact of inflammatory biomarkers in elderly patients treated with radical cystectomy for urothelial bladder cancer. *Arab J Urol*. 2021;19(1):2-8. doi:10.1080/2090598X.2020.1814974
3. D'Andrea D, Moschini M, Gust KM, et al. Lymphocyte-to-monocyte ratio and neutrophil-to-lymphocyte ratio as biomarkers for predicting lymph node metastasis and survival in patients treated with radical cystectomy. *J Surg Oncol*. 2017;115(4):455-461. doi:10.1002/jso.24521
4. Morizawa Y, Miyake M, Shimada K, et al. Neutrophil-to-lymphocyte ratio as a detection marker of tumor recurrence in patients with muscle-invasive bladder cancer after radical cystectomy. *Urol Oncol Semin Orig Investig*. 2016;34(6):257.e11-257.e17. doi:10.1016/J.UROLONC.2016.02.012
5. Viers BR, Boorjian SA, Frank I, et al. Pretreatment neutrophil-to-lymphocyte ratio is associated with advanced pathologic tumor stage and increased cancer-specific mortality among patients with urothelial carcinoma of the bladder undergoing radical cystectomy. *Eur Urol*. 2014;66(6):1157-1164. doi:10.1016/J.EURURO.2014.02.042
6. Tan YG, Eu E, Lau Kam On W, Huang HH. Pretreatment neutrophil-to-lymphocyte ratio predicts worse survival outcomes and advanced tumor staging in patients undergoing radical cystectomy for bladder cancer. *Asian J Urol*. 2017;4(4):239-246. doi:10.1016/j.ajur.2017.01.004
7. Hermanns T, Bhindi B, Wei Y, et al. Pre-treatment neutrophil-to-lymphocyte ratio as predictor of adverse outcomes in patients undergoing radical cystectomy for urothelial carcinoma of the bladder. *Br J Cancer*. 2014;111(3):444-451. doi:10.1038/bjc.2014.305
8. Bhindi B, Hermanns T, Wei Y, et al. Identification of the best complete blood count-based predictors for bladder cancer outcomes in patients undergoing radical cystectomy. *Br J Cancer*. 2016;114(2):207-212. doi:10.1038/bjc.2015.432
