# Supplementary material for: Blood-Based Biomarkers as Prognostic Factors of Recurrent Disease after Radical Cystectomy: A Systematic Review and Meta-Analysis
Source: MDPI journal article supplement (doi:10.3390/ijms24065846), 2023-03-19
Supplement: s1 [file s1]

**Table 2: Study characteristics, Meta-analysis**

| Author                       | Year | Sample Size | Gender (%female) | Age, years, median (range) | Median Follow up (range)  | HR, multivariate analysis (CI)     | NLR cut-off | p-value   | Timepoint NLR measurement | Neoadjuvant chemotherapy, n (%)  | previous radiotherapy, n (%)                                               |
|------------------------------|------|-------------|------------------|----------------------------|---------------------------|------------------------------------|-------------|-----------|---------------------------|----------------------------------|----------------------------------------------------------------------------|
| Mari et al. <sup>1</sup>     | 2021 | 255         | 16,90%           | 79 (75–83)                 | not reported              | Recurrence: HR 1.13 (0.96–1.32)    | NLR > 3     | p = 0.14  | preoperative              | none (patients excluded, n = 19) | 4 (1.6)                                                                    |
| D'Andrea et al. <sup>2</sup> | 2017 | 4198        | 20%              | 67 (60-73)                 | not reported              | RFS: HR 1.2 (1.1-1.3)              | NLR < 2.7   | p < 0.001 | preoperative              | none (patients excluded)         | not reported                                                               |
| Morizawa et al. <sup>3</sup> | 2016 | 110         | 22%              | 72 (65-76)                 | 37.5 months (11-65)       | RFS: HR 2.6 (1.1-6.0)              | NLR < 2.6   | p = 0.02  | preoperative              | 37 (34)*                         | not reported                                                               |
| Viers et al. <sup>4</sup>    | 2014 | 899         | 19,60%           | 69 (62-76)                 | 10.9 years (8.3 - 13.9)   | Recurrence: 1.04 (1.01–1.08)       | NLR > 2.7   | p = 0.02  | preoperative              | none (patients excluded, n = 53) | none (Patients excluded, n = 13)                                           |
| Tan et al. <sup>5</sup>      | 2017 | 84          | 25%              | 67 (37-82)                 | 30.1 months (3.2 - 161.7) | Recurrence: 6.999 (1.712 - 28.606) | NLR ≥ 2.7   | p = 0.007 | preoperative              | none (patients excluded, n = 16) | not reported                                                               |
| Hermanns et al. <sup>6</sup> | 2014 | 424         | 23,40%           | 70.1 (60.6-76.3)           | 58.4 months (21.3-94.5)   | Recurrence: HR 1.49 (1.12–2.00)    | NLR ≥ 3     | p = 0.007 | preoperative              | 29 (6.8)                         | salvage RC patients following failed chemoradiation were excluded (n = 20) |
| Bhindi et al. <sup>7</sup>   | 2016 | 418         | 23%              | 70 (61-76)                 | 40 months (14-72)         | RFS: HR 1.52 (1.17 - 1.98)         | NLR < 2.9   | p = 0.002 | preoperative              | 28 (7)                           | salvage RC patients following failed chemoradiation were excluded (n = 20) |

\*laboratory parameters were defined the date of initiation of neoadjuvant chemotherapy

NLR = neutrophil-to-lymphocyte ratio; RFS = recurrence free survival; HR = hazard ratio; RC = radical cystectomy; CI = confidence interval

## References

1. Mari A, Muto G, Di Maida F, et al. Oncological impact of inflammatory biomarkers in elderly patients treated with radical cystectomy for urothelial bladder cancer. *Arab J Urol.* 2021;19(1):2-8. doi:10.1080/2090598X.2020.1814974
2. D'Andrea D, Moschini M, Gust KM, et al. Lymphocyte-to-monocyte ratio and neutrophil-to-lymphocyte ratio as biomarkers for predicting lymph node metastasis and survival in patients treated with radical cystectomy. *J Surg Oncol.* 2017;115(4):455-461. doi:10.1002/jso.24521
3. Morizawa Y, Miyake M, Shimada K, et al. Neutrophil-to-lymphocyte ratio as a detection marker of tumor recurrence in patients with muscle-invasive bladder cancer after radical cystectomy. *Urol Oncol Semin Orig Investig.* 2016;34(6):257.e11-257.e17. doi:10.1016/J.UROLONC.2016.02.012
4. Viers BR, Boorjian SA, Frank I, et al. Pretreatment neutrophil-to-lymphocyte ratio is associated with advanced pathologic tumor stage and increased cancer-specific mortality among patients with urothelial carcinoma of the bladder undergoing radical cystectomy. *Eur Urol.* 2014;66(6):1157-1164. doi:10.1016/J.EURURO.2014.02.042
5. Tan YG, Eu E, Lau Kam On W, Huang HH. Pretreatment neutrophil-to-lymphocyte ratio predicts worse survival outcomes and advanced tumor staging in patients undergoing radical cystectomy for bladder cancer. *Asian J Urol.* 2017;4(4):239-246. doi:10.1016/j.ajur.2017.01.004
6. Hermanns T, Bhindi B, Wei Y, et al. Pre-treatment neutrophil-to-lymphocyte ratio as predictor of adverse outcomes in patients undergoing radical cystectomy for urothelial carcinoma of the bladder. *Br J Cancer.* 2014;111(3):444-451. doi:10.1038/bjc.2014.305
7. Bhindi B, Hermanns T, Wei Y, et al. Identification of the best complete blood count-based predictors for bladder cancer outcomes in patients undergoing radical cystectomy. *Br J Cancer.* 2016;114(2):207-212. doi:10.1038/bjc.2015.432
